# Supplementary material for: On-chip bioorthogonal chemistry enables immobilization of in situ modified nanoparticles and small molecules for label-free monitoring of protein binding and reaction kinetics
Source: Royal Society of Chemistry journal article supplement (doi:10.1039/c2lc40337d), 2012-01-01
Supplement: c2lc40337d.pdf [file c2lc40337d.pdf]

## ELECTRONIC SUPPLEMENTARY INFORMATION

### **On-Chip Bioorthogonal Chemistry Enables Immobilization of In Situ Modified Nanoparticles and Small Molecules for Label-Free Monitoring of Protein Binding and Reaction Kinetics**

Carlos Tassa, Monty Liong, Scott Hilderbrand, Jason E. Sandler, Thomas Reiner, Edmund J. Keliher, Ralph Weissleder\* and Stanley Y. Shaw\*

\* Corresponding authors

Stanley Y. Shaw      Email: shaw.stanley@mgh.harvard.edu  
Ralph Weissleder      Email: rweissleder@mgh.harvard.edu

Center for Systems Biology, Massachusetts General Hospital and Harvard Medical School  
Simches Research Center, 185 Cambridge St., Boston, MA 02114, USA

#### **Table of Contents**

|                                                                              | <i>Page</i> |
|------------------------------------------------------------------------------|-------------|
| <i>Determination of GST conjugate stability and loading</i>                  | <i>S2</i>   |
| <i>Measurements of small-molecule cycloaddition rates</i>                    | <i>S4</i>   |
| <i>Measurements of MNP-conjugate cycloaddition rates</i>                     | <i>S8</i>   |
| <i>Analytical LC/MS chromatograms and spectra for FKBP12 binding ligands</i> | <i>S11</i>  |
| <i>The binding of small-molecules 1 to immobilized FKBP12</i>                | <i>S13</i>  |
| <i>The binding of FKBP12 to immobilized small molecules 2</i>                | <i>S15</i>  |
| <i>On-Chip nanoparticle derivatization and binding of FKBP12</i>             | <i>S17</i>  |

Determination of GST conjugate stability and loading:

**Fig. S1.** GST amino acid sequence and crystal structure showing lysine residues

PDB ID: 1Y6E

```
1  spilgywkik glvqptrlll eyleekyeeh lyerdegdkw rnkkfelgle fpnlpyyidg  
61  dvkltqsmal iryiadkhnmlggcpkerae ismlegavld irygvsvriay skdfetlkvd  
121 flsklpemlk mfedrlchkt ylngdhvthp dfmlydaldv vlymdpmcld afpklvcfkk  
181 rieaipqidk ylksskyiaw plqgwqatfg ggdhppksdl vpr
```

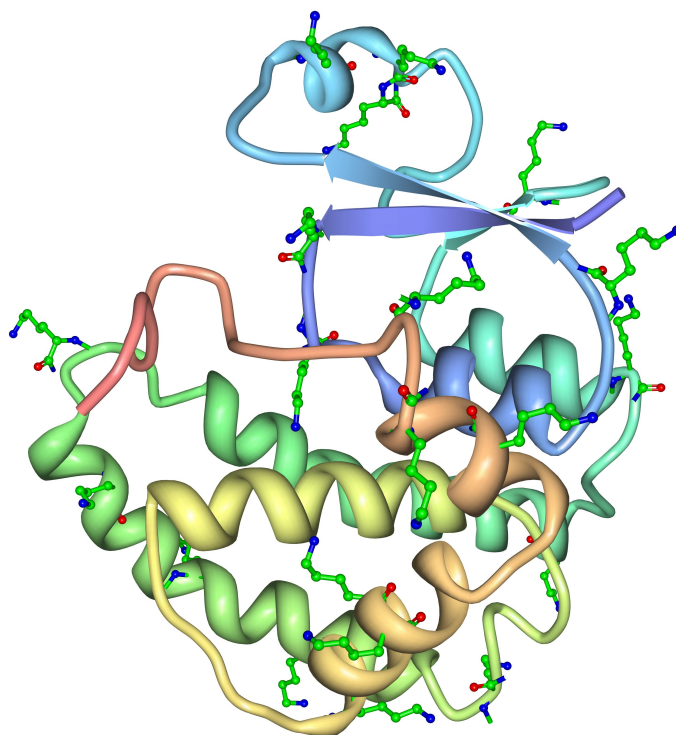

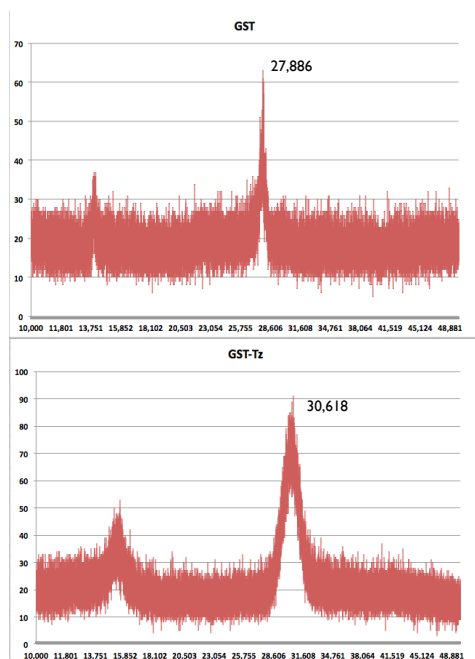

**Fig. S2.** MALDI-TOF spectra showing the mass for GST and Tz-modified GST. The difference in mass is indicative of Tz loading.

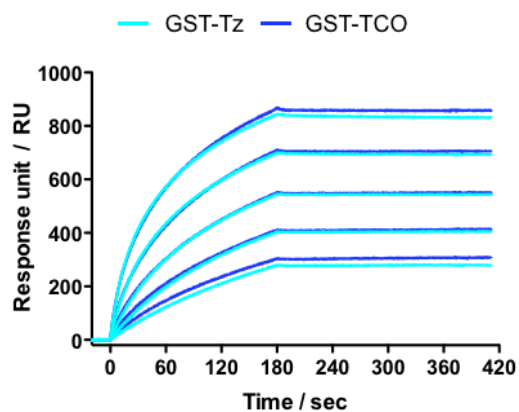

**Fig. S3** Overlay of sensograms showing GST-Tz and GST-TCO capture and stability.

Measurements of small molecule cycloaddition rates:

**Table S1.** Summary of cycloaddition (association) rate constants,  $k_a$  for small molecules in various buffer conditions.

| Buffer        | Analyte              | Ligand | $k_a$ M <sup>-1</sup> s <sup>-1</sup> | SEM   |
|---------------|----------------------|--------|---------------------------------------|-------|
| PBS           | Tz-BnNH <sub>2</sub> | TCO    | 34,062                                | 1,536 |
| RPMI, 10% FBS | Tz-BnNH <sub>2</sub> | TCO    | 23,740                                | 180   |
| 100% FBS      | Tz-BnNH <sub>2</sub> | TCO    | 11,943                                | 2,987 |
| PBS           | TCO-OH               | Tz     | 18,880                                | 1,570 |
| RPMI, 10% FBS | TCO-OH               | Tz     | 12,775                                | 925   |
| 100% FBS      | TCO-OH               | Tz     | 2,415                                 | 111   |

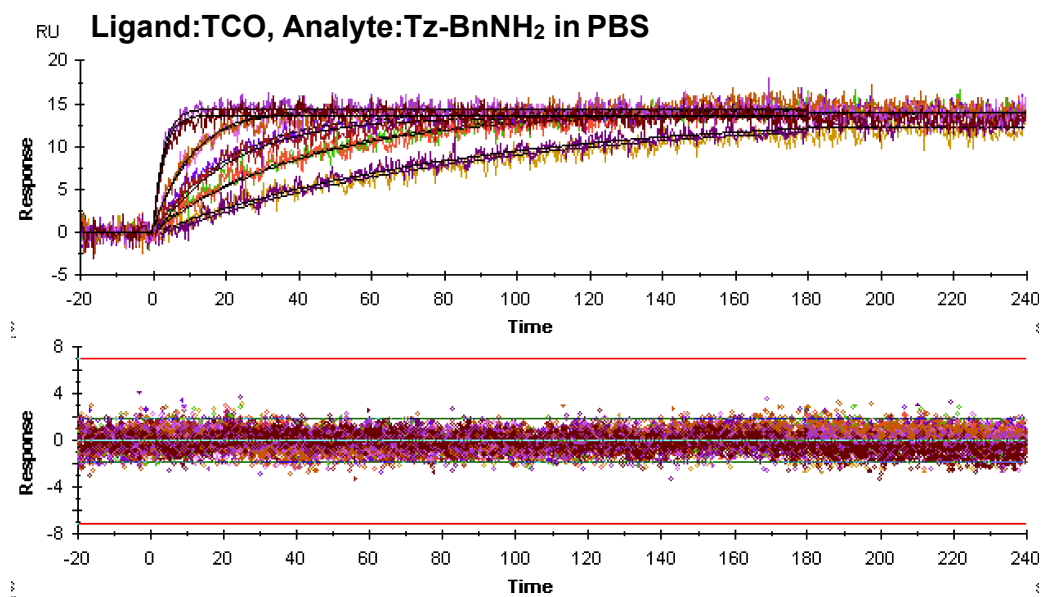

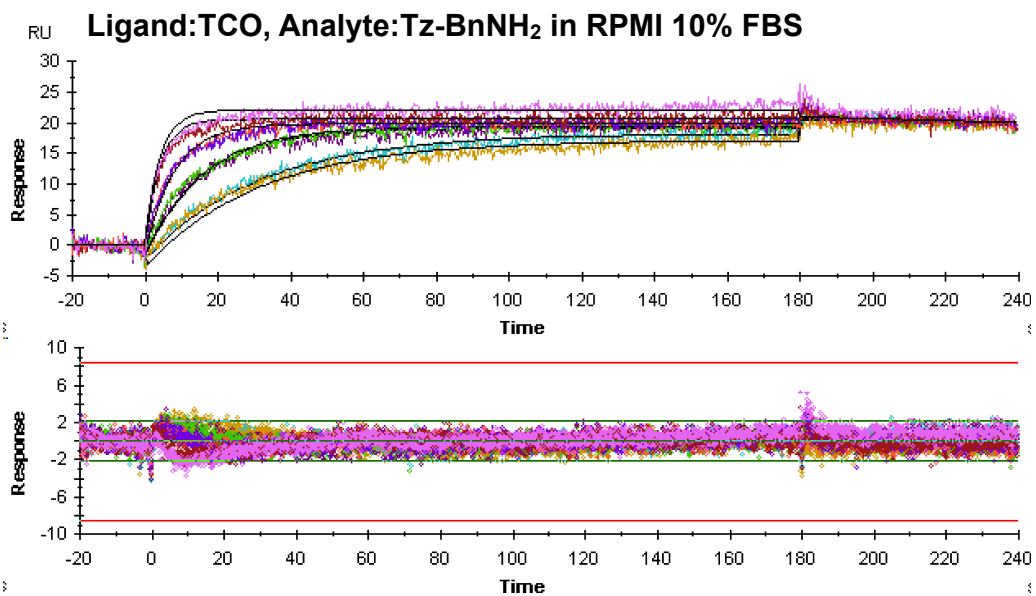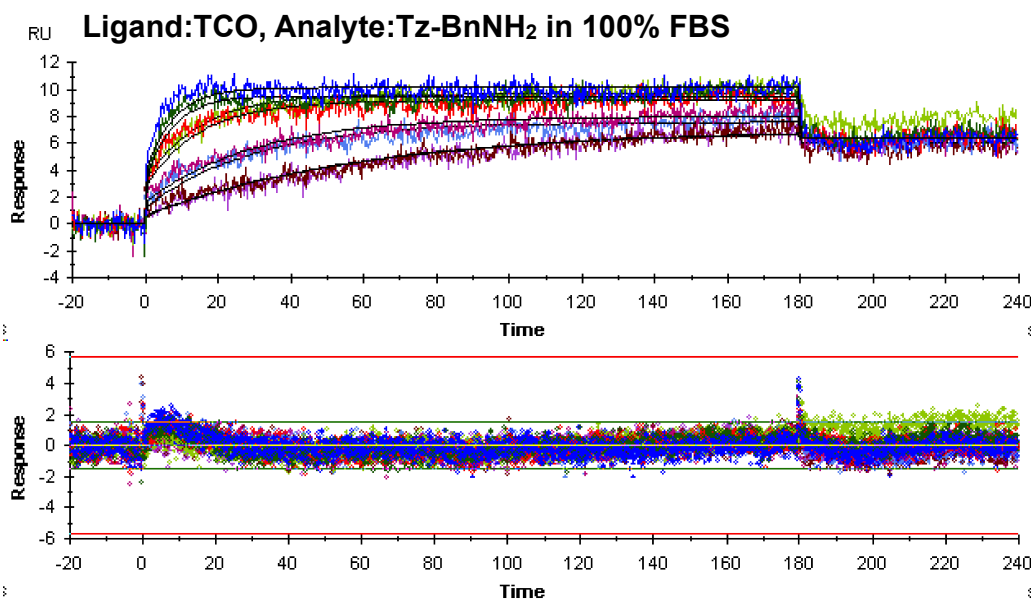

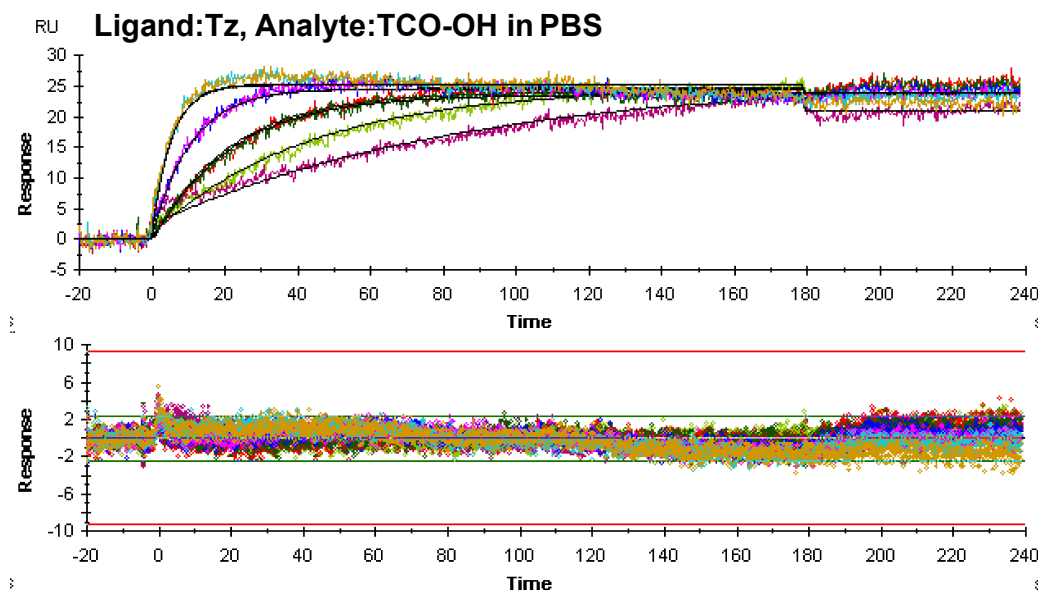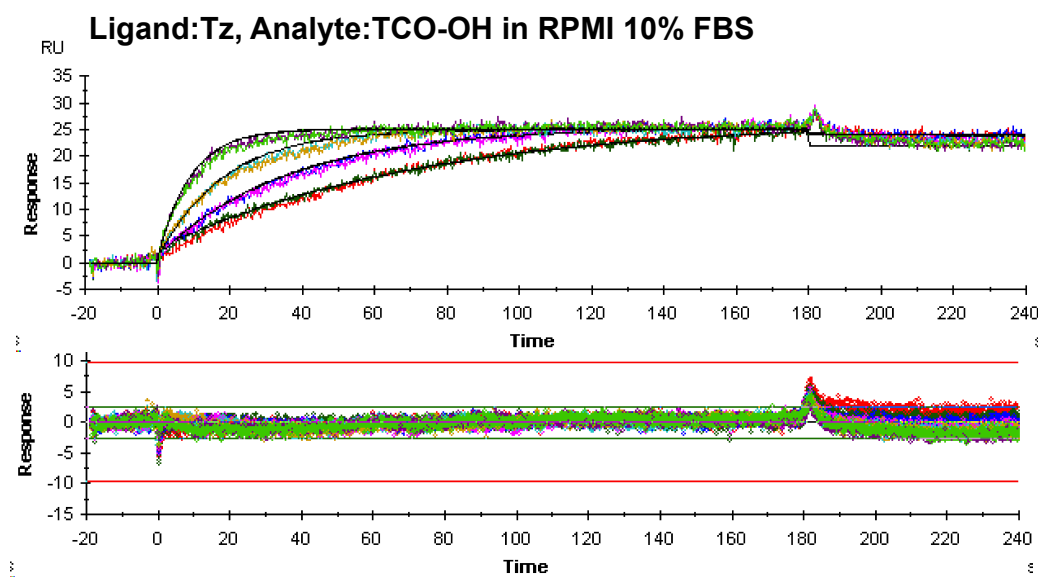

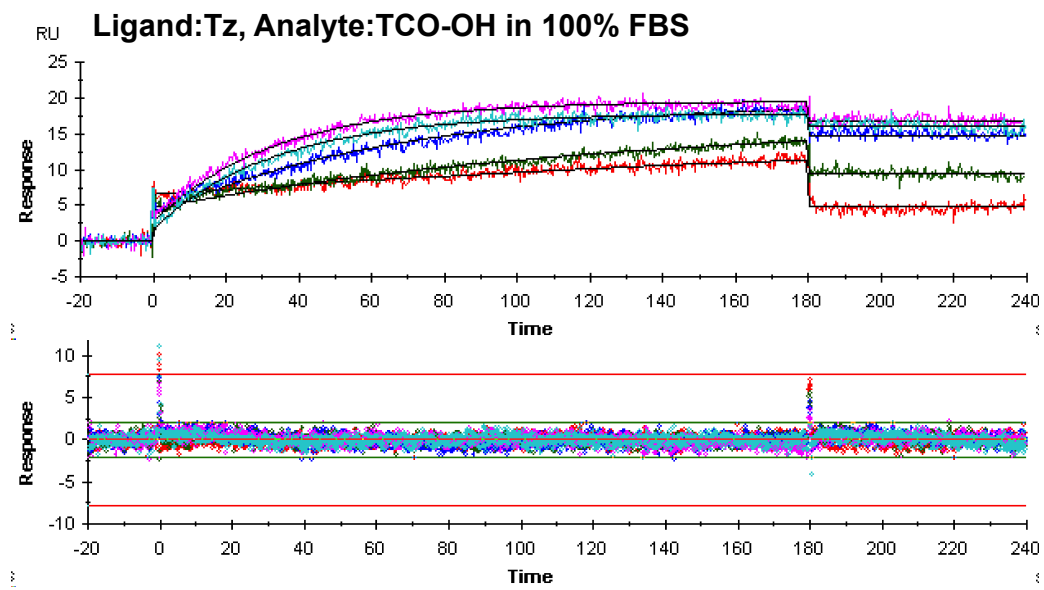

Measurements of MNP-conjugate cycloaddition rates:

**Table S2.** Summary of cycloaddition (association) rate constants,  $k_a$  for MNPs in various buffer conditions.

| Buffer   | Analyte | Ligand | $k_a$ M <sup>-1</sup> s <sup>-1</sup> | SEM   |
|----------|---------|--------|---------------------------------------|-------|
| PBS      | MNP-Tz  | TCO    | 89,573                                | 4,412 |
| 100% FBS | MNP-Tz  | TCO    | 28,705                                | 1,145 |
| PBS      | MNP-TCO | Tz     | 235,440                               | 4,554 |
| 100% FBS | MNP-TCO | Tz     | 118,200                               | 5,500 |

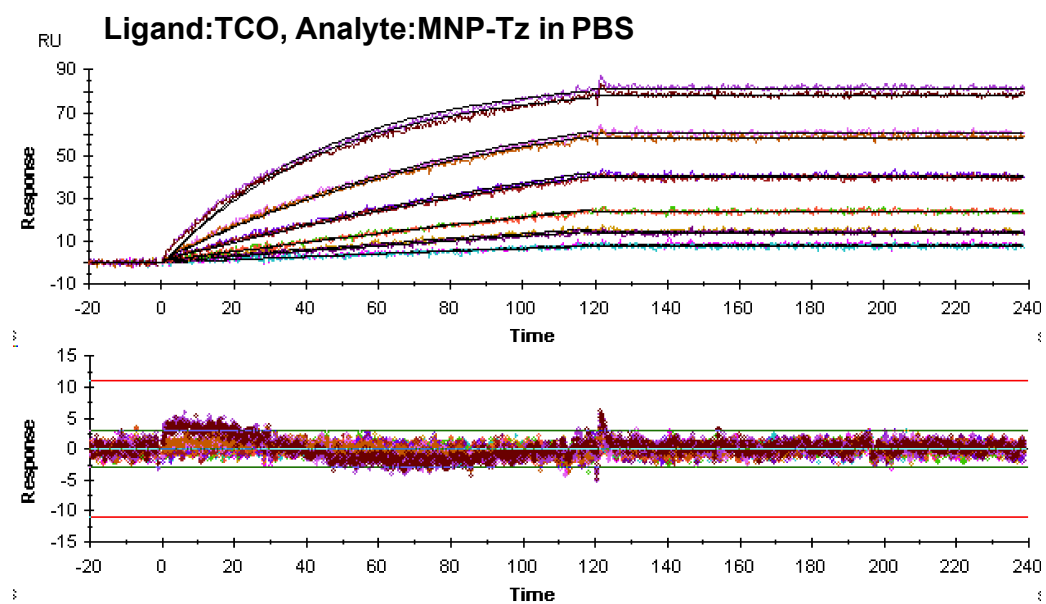



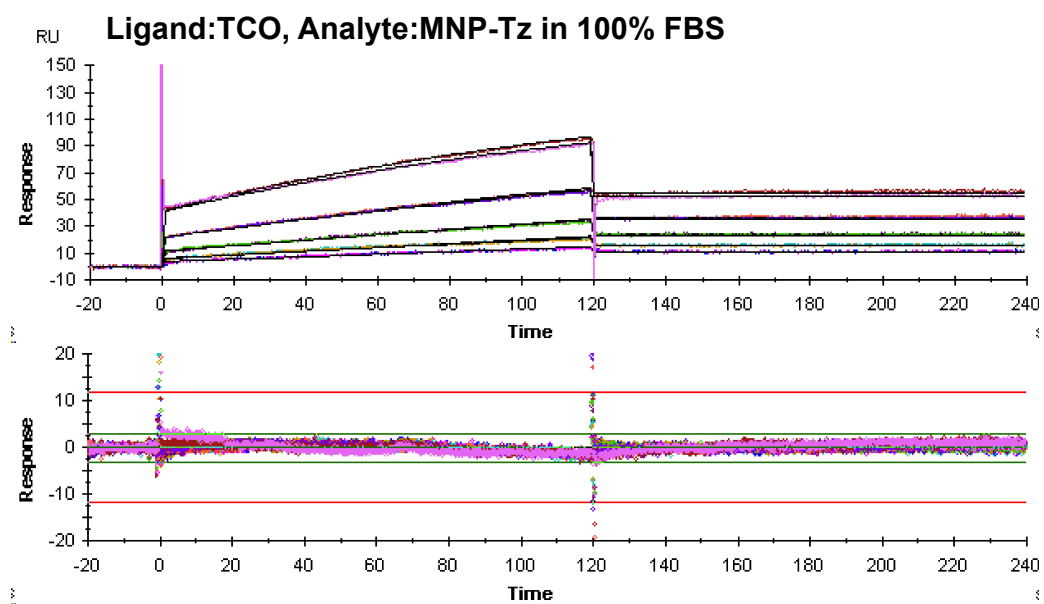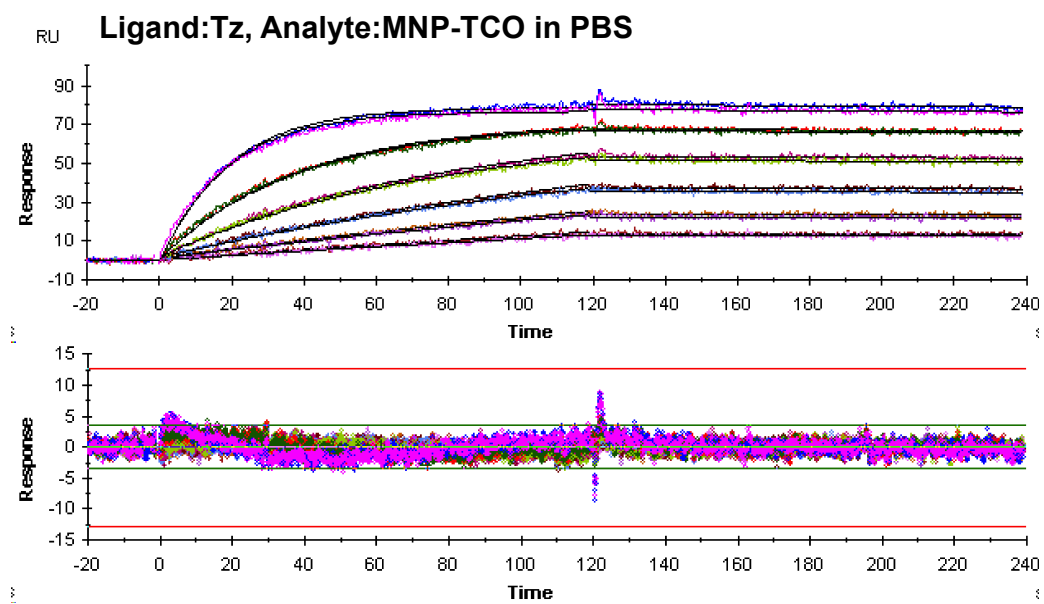

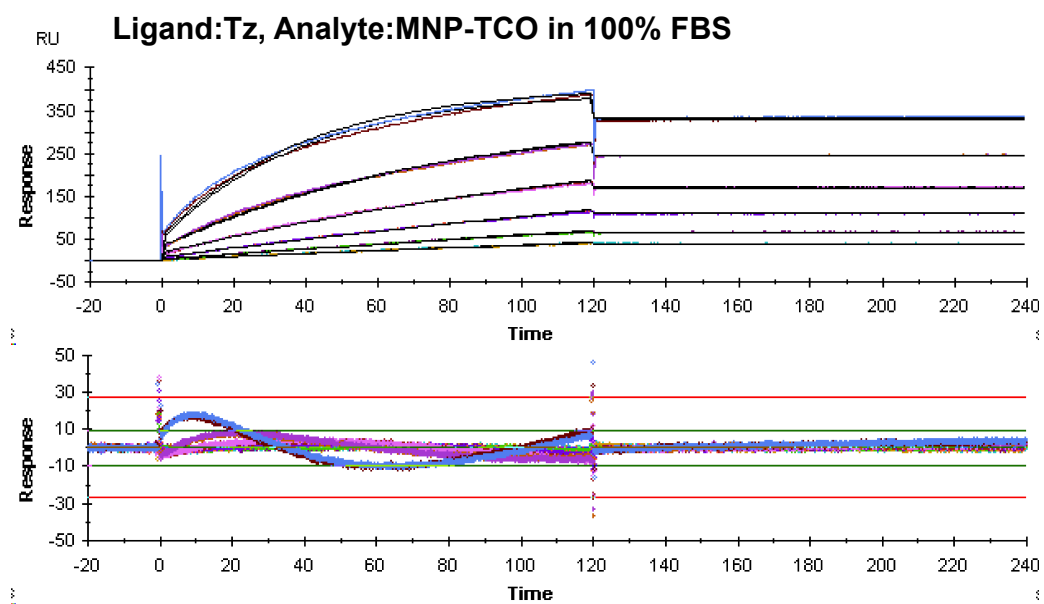

*Analytical LC/MS chromatograms and spectra for FKBP12 binding ligands:*

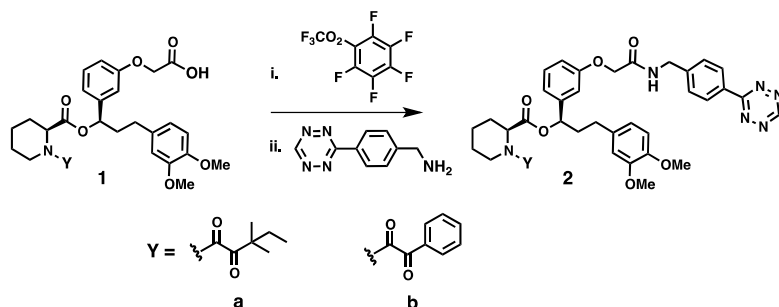

(S)-(R)-1-(3-(2-((4-(1,2,4,5-tetrazin-3-yl)benzyl)amino)-2-oxoethoxy)phenyl)-3-(3,4-dimethoxyphenyl)propyl 1-(3,3-dimethyl-2-oxopentanoyl)piperidine-2-carboxylate (2a).

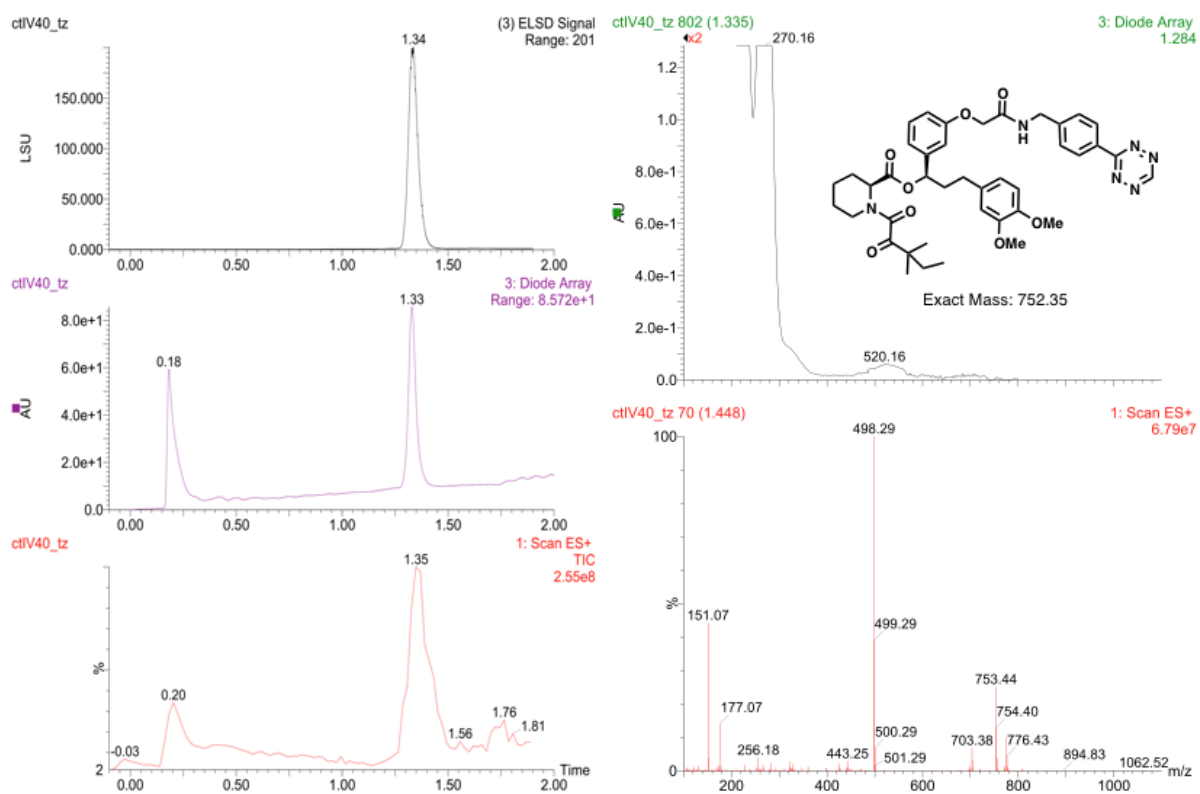

(*S*)-(*R*)-1-(3-(2-((4-(1,2,4,5-tetrazin-3-yl)benzyl)amino)-2-oxoethoxy)phenyl)-3-(3,4-dimethoxyphenyl)propyl 1-(2-oxo-2-phenylacetyl)piperidine-2-carboxylate (2b).

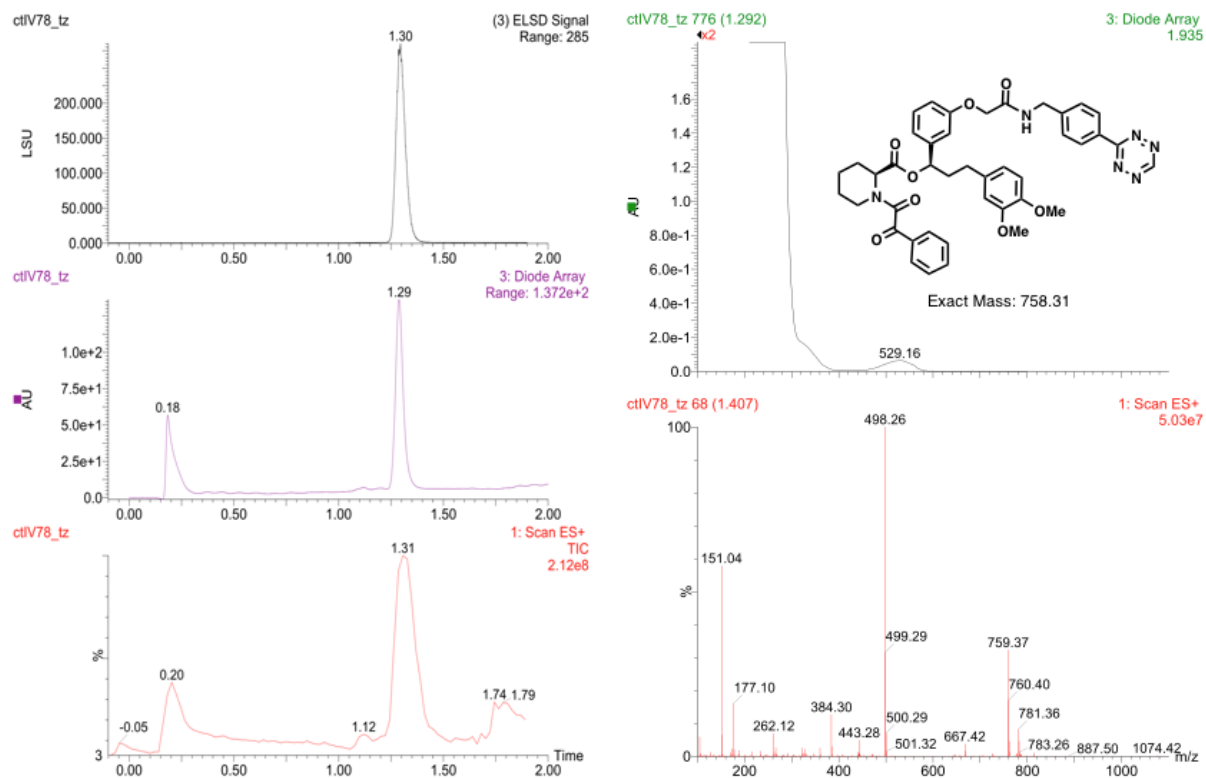

The binding of small-molecules 1 to immobilized FKBP12:

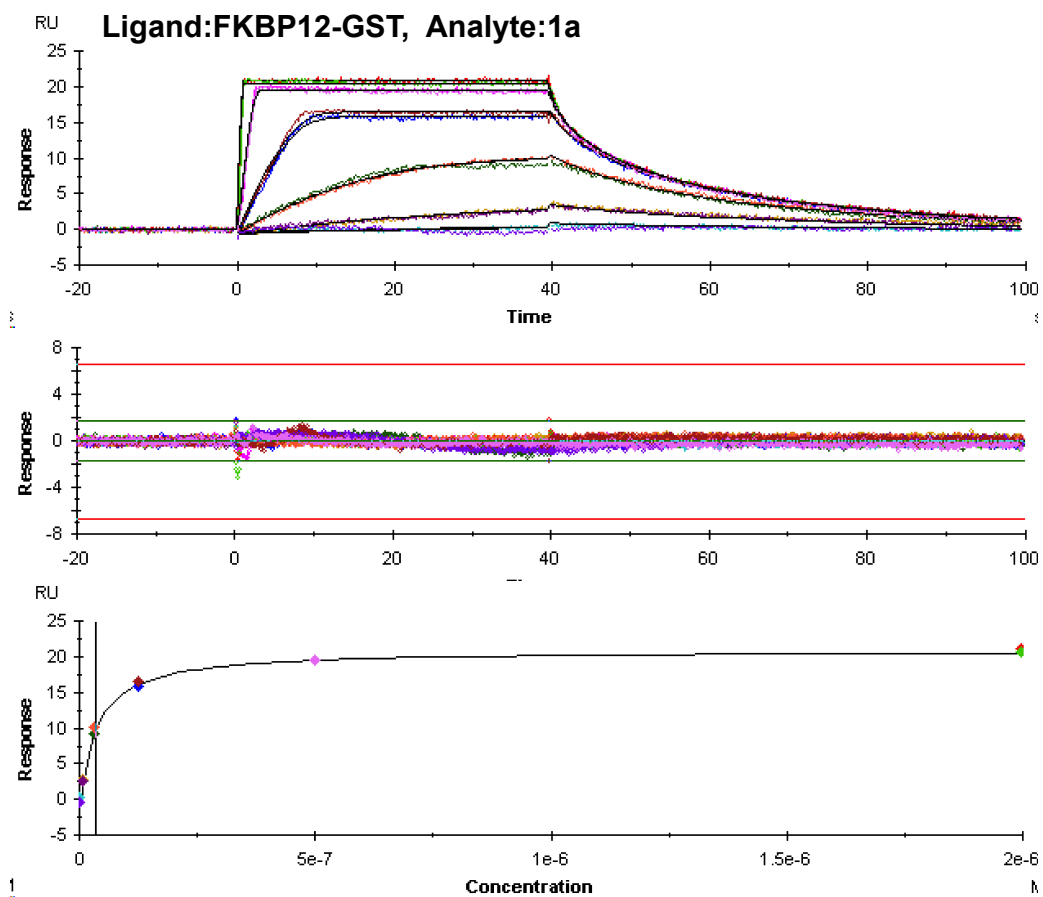

Kinetic analysis:  $k_a = 1.83 \times 10^7 \text{ M}^{-1}\text{s}^{-1}$ ,  $k_d = 0.553 \text{ s}^{-1}$ ,  $K_D = 30.3 \text{ nM}$ ,  $\chi^2 = 0.08$   
Steady state analysis:  $K_D = 34.2 \text{ nM}$ ,  $\chi^2 = 0.14$

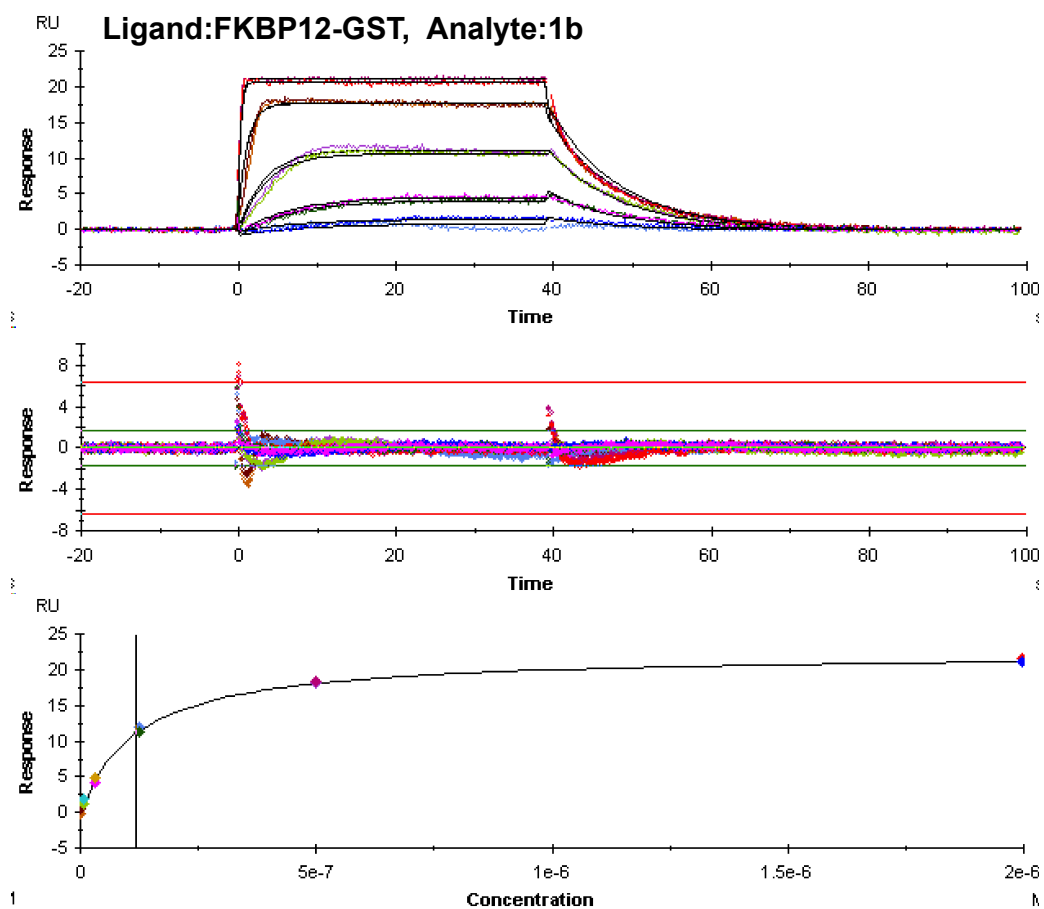

Kinetic analysis:  $k_a = 1.48 \times 10^6 \text{ M}^{-1}\text{s}^{-1}$ ,  $k_d = 0.114 \text{ s}^{-1}$ ,  $K_D = 76.8 \text{ nM}$ ,  $\chi^2 = 0.20$   
Steady state analysis:  $K_D = 117 \text{ nM}$ ,  $\chi^2 = 0.13$

The binding of FKBP12 to immobilized small molecules 2:

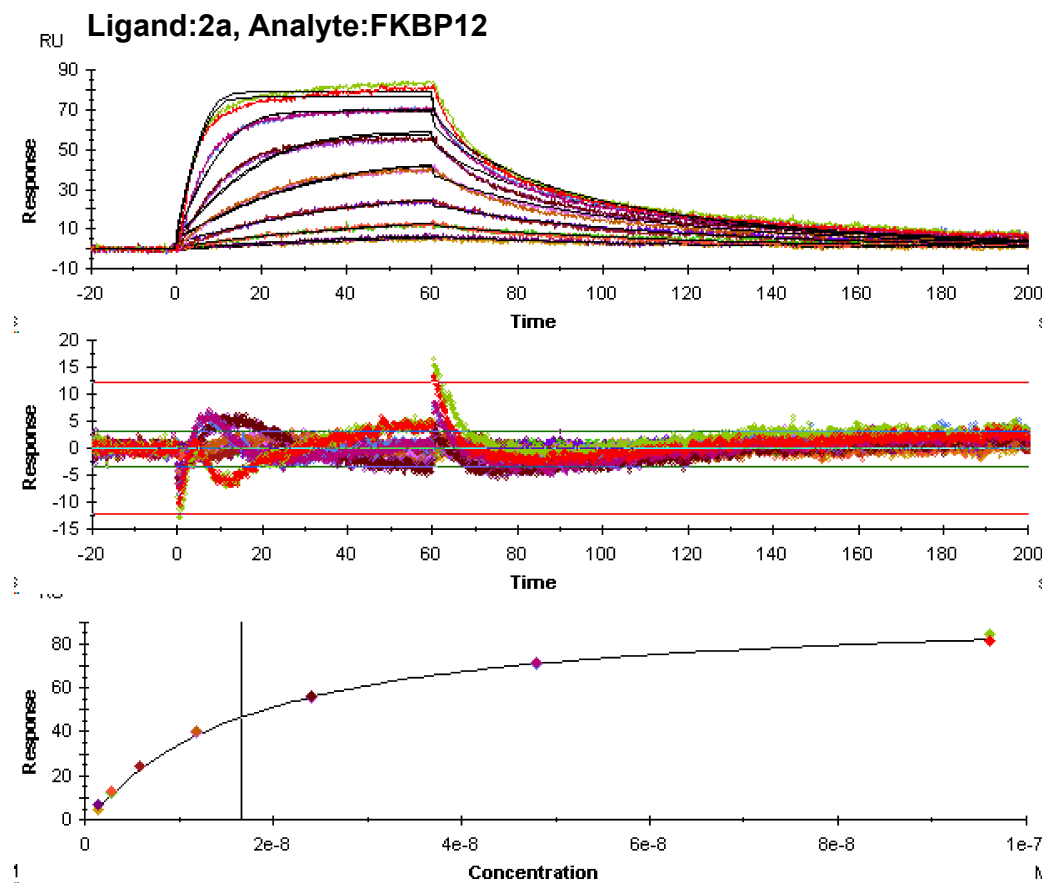

Kinetic analysis:  $k_a = 5.98 \times 10^6 \text{ M}^{-1}\text{s}^{-1}$ ,  $k_d = 5.55 \times 10^{-2} \text{ s}^{-1}$ ,  $K_D = 11.0 \text{ nM}$ ,  $\chi^2 = 3.49$   
Steady state analysis:  $K_D = 16.7 \text{ nM}$ ,  $\chi^2 = 0.89$

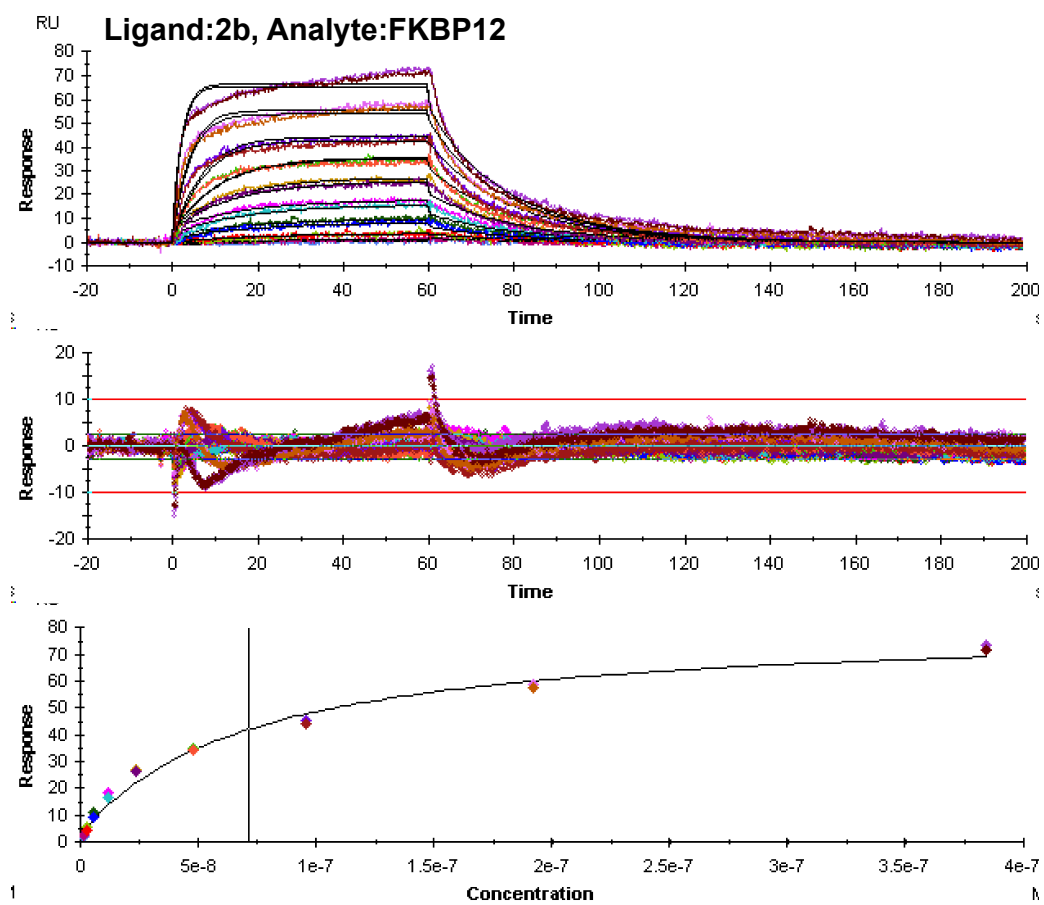

Kinetic analysis:  $k_a = 1.22 \times 10^6 \text{ M}^{-1}\text{s}^{-1}$ ,  $k_d = 6.36 \times 10^{-2} \text{ s}^{-1}$ ,  $K_D = 52.3 \text{ nM}$ ,  $\chi^2 = 3.37$   
Steady state analysis:  $K_D = 71.6 \text{ nM}$ ,  $\chi^2 = 8.75$



On-Chip nanoparticle derivatization and binding of FKBP12:

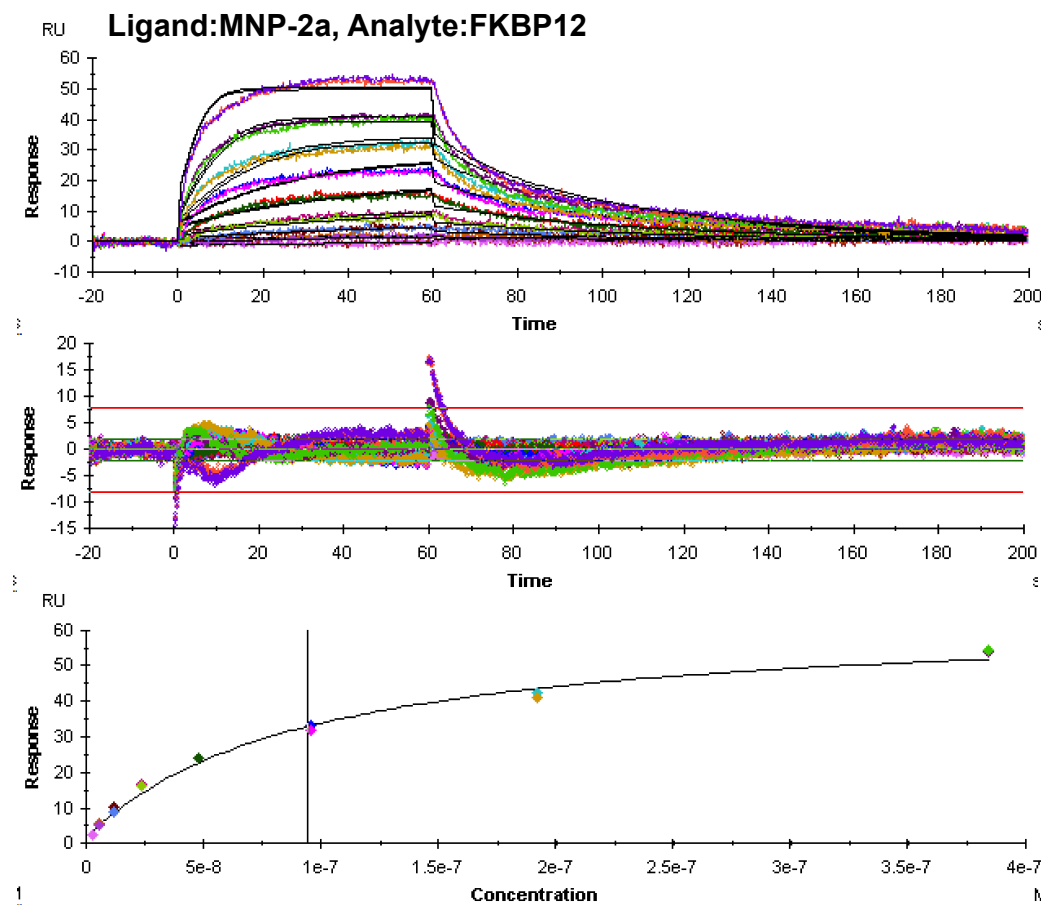

Kinetic analysis:  $k_a = 8.82 \times 10^5 \text{ M}^{-1}\text{s}^{-1}$ ,  $k_d = 3.76 \times 10^{-2} \text{ s}^{-1}$ ,  $K_D = 42.6 \text{ nM}$ ,  $\chi^2 = 2.61$   
Steady state analysis:  $K_D = 94.2 \text{ nM}$ ,  $\chi^2 = 2.61$

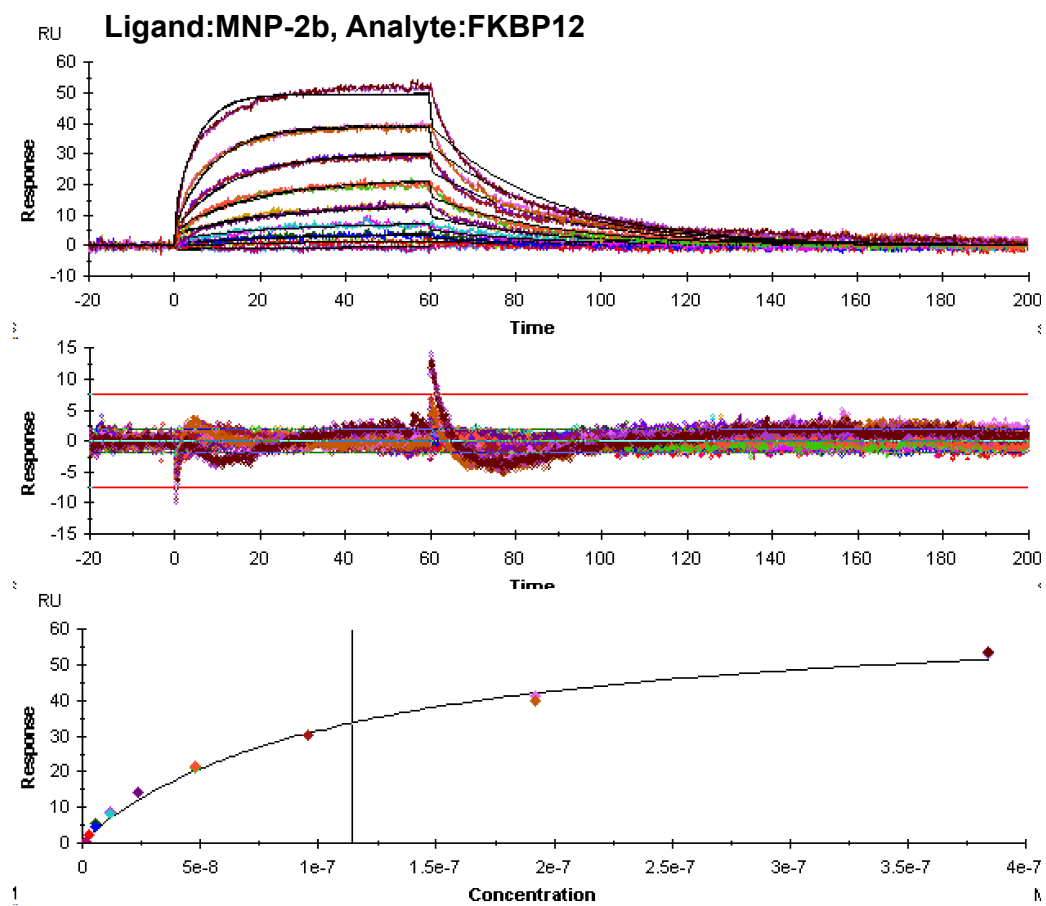

Kinetic analysis:  $k_a = 3.91 \times 10^5 \text{ M}^{-1}\text{s}^{-1}$ ,  $k_d = 3.63 \times 10^{-2} \text{ s}^{-1}$ ,  $K_D = 92.7 \text{ nM}$ ,  $\chi^2 = 1.56$   
Steady state analysis:  $K_D = 114 \text{ nM}$ ,  $\chi^2 = 1.89$
